# Supplementary material
Source: Springer Nature journal article supplement (https://www.springermedizin.de/resource/supplementary/12990_2014_662_MOESM4_ESM.pdf/9612330)

**A**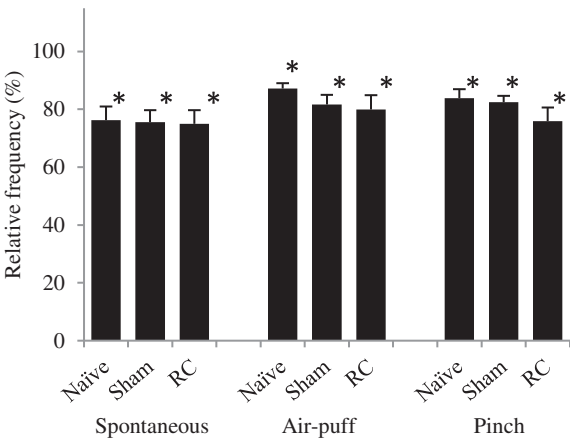**B**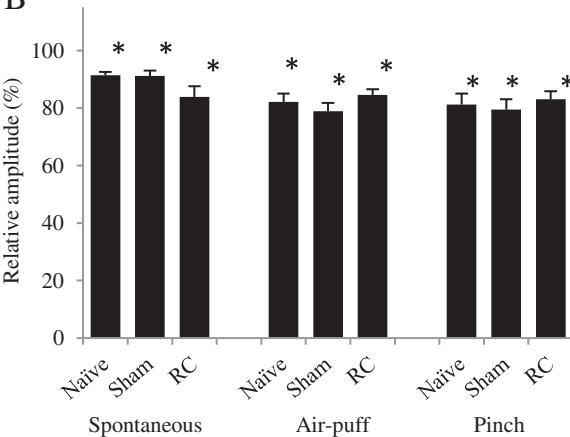

Supplement: MOESM4 [file 9612330]
